# Supplementary material
Source: PubMed Central journal article supplement (PMC7757621)
Supplement: Suppl_FigS1.pdf [file Suppl_FigS1.pdf]

## Supplementary Data

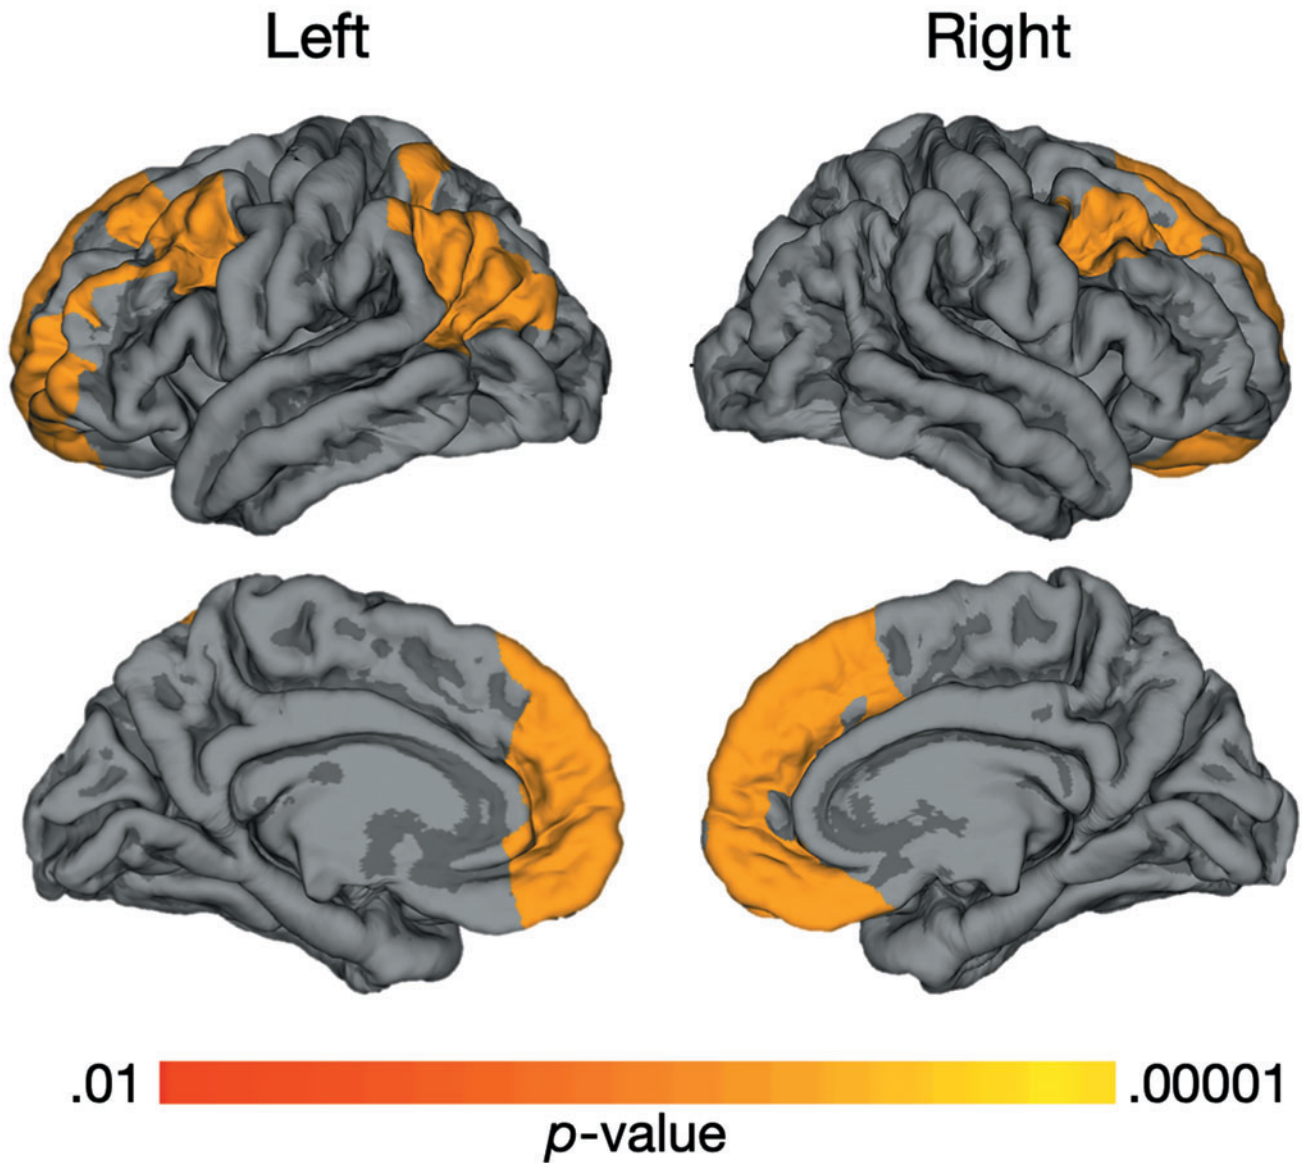

**SUPPLEMENTARY FIG. S1.** Comparison of Local Gyrication Index (LGI) between traumatic brain injury (TBI;  $n=17$ ) and typically-developing child (TDC;  $n=17$ ) groups, with study site included as a covariate. Warm colors highlight regions of significant difference in LGI between groups, where increased LGI is demonstrated in the TBI group after controlling for the effects of study site. The most significant differences appear in yellow in the bilateral medial and dorsolateral frontal, and left parietal regions of the cortical surface, which are among the latest to develop. With the exception of initial findings in the right temporal lobe, these results are similar to those of the original analysis, in which study site was not included as a covariate.
