# Supplementary material
Source: PubMed Central journal article supplement (PMC7757621)
Supplement: Suppl_FigS2.pdf [file Suppl_FigS2.pdf]

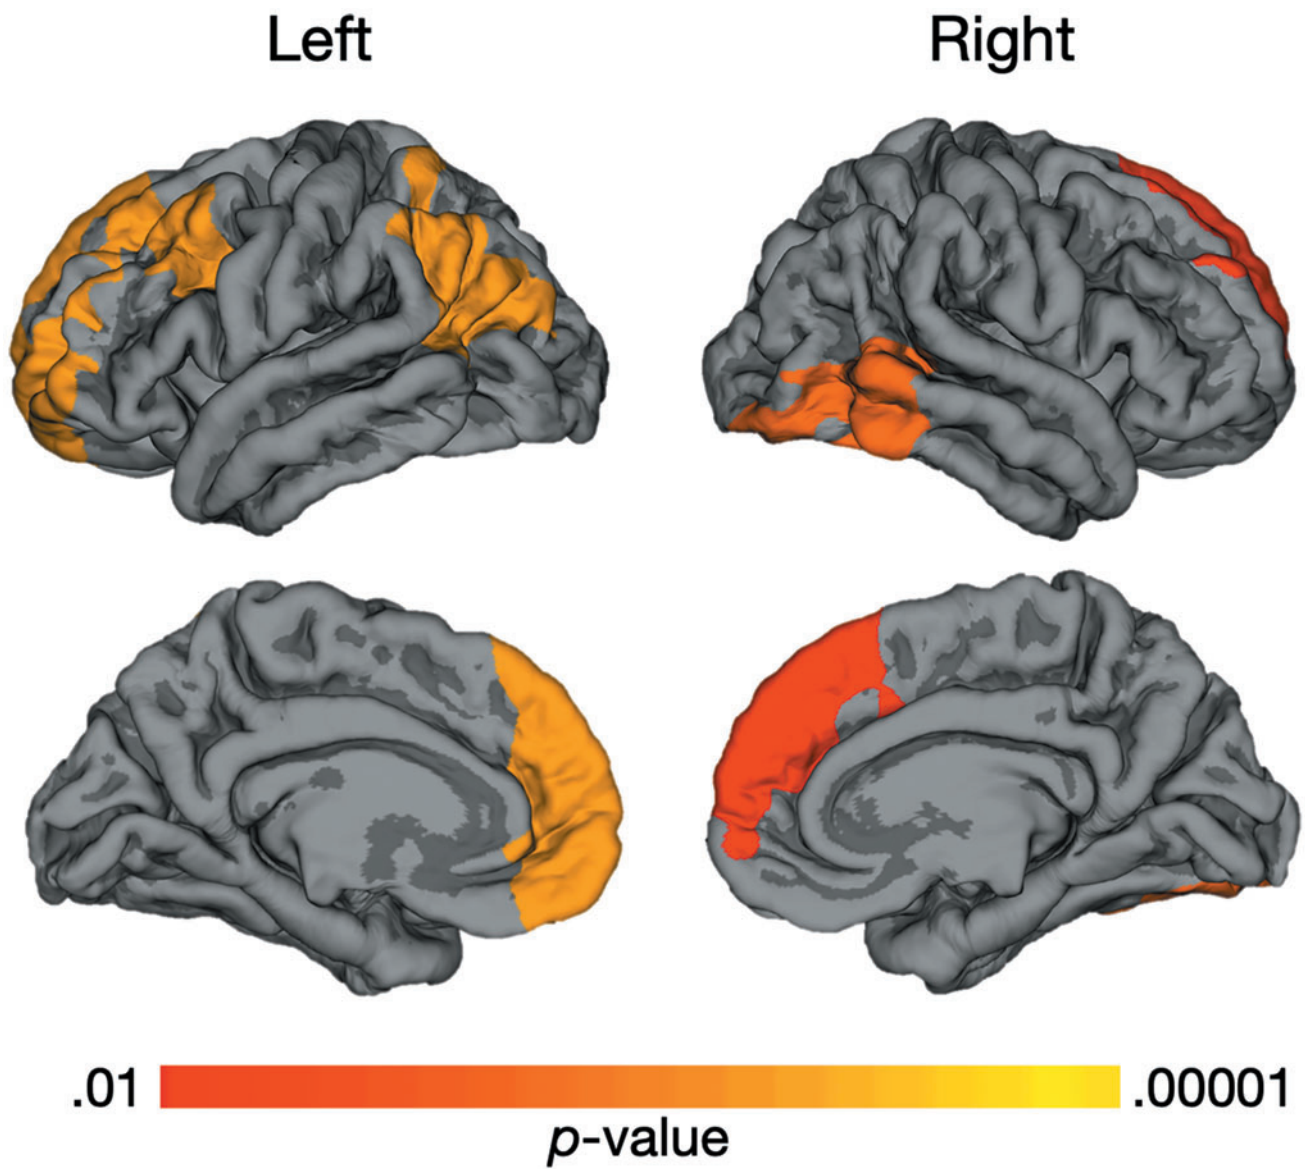

**SUPPLEMENTARY FIG. S2.** Comparison of Local Gyrification Index (LGI) between traumatic brain injury (TBI;  $n=15$ ) and typically-developing child (TDC;  $n=17$ ) groups, excluding two TBI subjects with observable lesions that may have affected cortical surface reconstruction (see Supplementary Table S1). Warm colors highlight regions of significant difference in LGI between groups, where increased LGI is demonstrated in the TBI group. The most significant differences appear in yellow in the left medial and dorsolateral frontal, left parietal, and right temporal areas of the cortical surface, which are among the latest to develop. These results are similar to those of the original analysis ( $n=34$ ), albeit with less extensive results in the right frontal lobe.
