# Supplementary material
Source: PubMed Central journal article supplement (PMC7757621)
Supplement: Suppl_TableS1.pdf [file Suppl_TableS1.pdf]

SUPPLEMENTARY TABLE S1. TRAUMATIC BRAIN INJURED PATIENT LESIONS THAT MAY HAVE INTERFERED WITH CORTICAL SURFACE RECONSTRUCTION IN FREESURFER

| <i>Age at scan</i> | <i>Sex</i> | <i>Lesion</i>                                                         | <i>FreeSurfer output</i>                                                                                                                                                                                                                           | <i>Results of editing</i>                                   | <i>Primary analysis (n=34)</i> | <i>Supplemental analysis (n=32)</i> |
|--------------------|------------|-----------------------------------------------------------------------|----------------------------------------------------------------------------------------------------------------------------------------------------------------------------------------------------------------------------------------------------|-------------------------------------------------------------|--------------------------------|-------------------------------------|
| 11                 | F          | R inferior frontal                                                    | FreeSurfer surfaces do not accurately follow the brain in regions near the lesion (right lateral and medial orbital frontal gyri)                                                                                                                  | Improved accuracy of surfaces                               | Included                       | Excluded                            |
| 14                 | M          | L putaminal                                                           | Small white matter segmentation error in region near the lesion (left putamen); the white matter surface does not follow the boundary between the gray and white matter but instead cuts into the white matter and is followed by the pial surface | Did not edit (very small region affected)                   | Included                       | Excluded                            |
| 11                 | M          | R cerebellar                                                          | Lesion affects segmentation of the cerebellum, but not the cortical surfaces                                                                                                                                                                       | Did not edit (not necessary)                                | Included                       | Included                            |
| 12                 | F          | L temporal stem                                                       | FreeSurfer surfaces do not accurately follow the brain in regions near the lesion (left medial temporal gyrus and temporal pole)                                                                                                                   | Surfaces appear more accurate, but some inaccuracies remain | Excluded                       | Excluded                            |
| 17                 | M          | R temporal stem, R superior frontal/ corpus callosum, L temporal stem | Extensive regions of right anterior temporal lobe surfaces are inaccurate                                                                                                                                                                          | Did not edit (too extensive)                                | Excluded                       | Excluded                            |

F, female; R, right; M, male; L, left.
